# Supplementary material for: Disconnection of network hubs and cognitive impairment after traumatic brain injury
Source: PubMed Central journal article supplement — Brain. 2015 Mar 22;138(6):1696–709. doi: 10.1093/brain/awv075 (PMC4614120; doi:10.1093/brain/awv075), 2015-03-22
Supplement: 4c353c618a713d3ecbe1cc8076adb23c_brain-2014-01275-File016.pdf [file 4c353c618a713d3ecbe1cc8076adb23c_brain-2014-01275-File016.pdf]

| Age | Sex | Severity | Cause     | Lowest GCS recorded | PTA     | Medication at time of scanning                    | Structural MRI Findings           |      |    |
|-----|-----|----------|-----------|---------------------|---------|---------------------------------------------------|-----------------------------------|------|----|
|     |     |          |           |                     |         |                                                   | Brief Remarks                     | Cont | MB |
| 24  | F   | Mod/Sev  | Uncertain | NK                  | NK      |                                                   | R FT and O Cont                   | Y    | Y  |
| 31  | M   | Mod/Sev  | RTA       | 14                  | 8 h     | Theophylline Seritide                             | L F, P and T Cont                 | Y    | Y  |
| 34  | M   | Mod/Sev  | Fall      | 4                   | 52 d    |                                                   | B FT Cont                         | Y    | Y  |
| 36  | M   | Mod/Sev  | Fall      | NK                  | 8 h     | Keppra Phenytoin                                  | B FT Cont                         | Y    | Y  |
| 44  | F   | Mod/Sev  | RTA       | 5                   | 6 w     |                                                   | CC Cont                           | Y    | Y  |
| 52  | F   | Mod/Sev  | Fall      | NK                  | 36 h    | Methotrexate, Thyroxine, Etanercept injections    | B F Cont and SS                   | Y    | Y  |
| 54  | M   | Mod/Sev  | RTA       | 3                   | < 24 h  | Salbutamol inhaler                                | R T Cont                          | Y    | Y  |
| 20  | M   | Mod/Sev  | RTA       | NK                  | 2-3 w   | Gamapentin, Amitriptyline, Omeprazole, Etoricoxib |                                   |      | Y  |
| 22  | M   | Mod/Sev  | Sports    | NK                  | 30 m    |                                                   |                                   |      | Y  |
| 23  | M   | Mod/Sev  | Assault   | 14                  | 4-5 h   |                                                   |                                   |      | Y  |
| 23  | M   | Mod/Sev  | RTA       | 6                   | 1 m     | Codeine, Zopiclone, Omeprazole                    |                                   |      | Y  |
| 34  | M   | Mod/Sev  | RTA       | NK                  | 10-11 d |                                                   | DAI                               |      | Y  |
| 35  | F   | Mod/Sev  | RTA       | NK                  | >2 w    |                                                   |                                   |      | Y  |
| 35  | F   | Mod/Sev  | RTA       | 6                   | 1 m     |                                                   | SS                                |      | Y  |
| 36  | M   | Mod/Sev  | RTA       | 6                   | 1 m     |                                                   |                                   |      | Y  |
| 40  | M   | Mod/Sev  | NK        | 4                   | 3 m     |                                                   | R T, O,L F and TP gliotic changes |      | Y  |
| 42  | M   | Mod/Sev  | Fall      | 9                   | >24 h   |                                                   | SS                                |      | Y  |
| 43  | M   | Mod/Sev  | RTA       | NK                  | NK      | Tramadol, Nortriptyline, Fluoxetine, Simvastatin  | DAI                               |      | Y  |
| 48  | M   | Mod/Sev  | Assault   | NK                  | 1 m     |                                                   |                                   |      | Y  |
| 53  | M   | Mod/Sev  | Fall      | 3                   | NK      | BP Medication                                     | SS                                |      | Y  |
| 59  | M   | Mod/Sev  | RTA       | NK                  | <12 h   | Atorvastatin, Lamotrigine                         |                                   |      | Y  |
| 25  | M   | Mod/Sev  | Syncope   | 15                  | 30 m    |                                                   | B F Cont                          | Y    |    |
| 26  | F   | Mod/Sev  | RTA       | 14                  | 6 h     |                                                   | R F Cont                          | Y    |    |
| 33  | F   | Mod/Sev  | RTA       | 15                  | <5 m    | Thyroxine, Balsalazide                            | R T Cont                          | Y    |    |
| 48  | M   | Mod/Sev  | Assault   | NK                  | >1 d    |                                                   | B FT Cont                         | Y    |    |
| 48  | M   | Mod/Sev  | RTA       | 4                   | 6 w     | Ramipril, Amlodipine                              | R FT Cont and SS                  | Y    |    |
| 60  | F   | Mod/Sev  | RTA       | NK                  | 11 w    |                                                   |                                   | Y    |    |
| 16  | M   | Mod/Sev  | Fall      | 15                  | NK      |                                                   |                                   |      |    |
| 20  | M   | Mod/Sev  | Sports    | 15                  | 72 h    | Tramadol, Diclofanac                              |                                   |      |    |
| 21  | F   | Mod/Sev  | RTA       | 15                  | 8 h     | Tramadol                                          | SS                                |      |    |
| 21  | M   | Mod/Sev  | Sports    | NK                  | 30-60 m |                                                   |                                   |      |    |
| 22  | M   | Mod/Sev  | Assault   | 15                  | 3-4 d   | Salbutamol, Pentasa                               |                                   |      |    |
| 24  | M   | Mod/Sev  | Assault   | 13                  | NK      |                                                   |                                   |      |    |
| 28  | F   | Mild     | Fall      | NK                  | NK      |                                                   |                                   |      |    |
| 28  | M   | Mod/Sev  | Assault   | 4                   | NK      |                                                   | SS                                |      |    |
| 28  | M   | Mod/Sev  | RTA       | NK                  | >72 h   |                                                   |                                   |      |    |
| 31  | F   | Mod/Sev  | Fall      | NK                  | NK      |                                                   | SS                                |      |    |
| 33  | M   | Mod/Sev  | RTA       | NK                  | 90 m    |                                                   |                                   |      |    |
| 35  | F   | Mod/Sev  | RTA       | 12                  | 8-10 w  | Cocodamol                                         |                                   |      |    |
| 35  | F   | Mod/Sev  | RTA       | NK                  | <24 h   | Thyroxine                                         |                                   |      |    |
| 35  | F   | Mod/Sev  | Fall      | 15                  | NK      |                                                   |                                   |      |    |
| 38  | M   | Mod/Sev  | Assault   | NK                  | 2 h     |                                                   |                                   |      |    |
| 38  | M   | Mod/Sev  | RTA       | NK                  | NK      |                                                   |                                   |      |    |
| 44  | M   | Mod/Sev  | Assault   | 8                   | 1 m     |                                                   |                                   |      |    |
| 45  | F   | Mod/Sev  | RTA       | NK                  | <5 m    |                                                   |                                   |      |    |
| 46  | F   | Mild     | Accident  | 15                  | NK      | Paracetamol                                       |                                   |      |    |
| 46  | M   | Mod/Sev  | RTA       | 15                  | <1 h    |                                                   |                                   |      |    |
| 46  | M   | Mod/Sev  | Assault   | NK                  | NK      |                                                   | SS                                |      |    |
| 49  | M   | Mod/Sev  | Fall      | NK                  | 48 h    | Amlodipine, Simvastatin                           |                                   |      |    |
| 50  | M   | Mod/Sev  | Fall      | 15                  | NK      |                                                   |                                   |      |    |
| 53  | F   | Mild     | Sports    | 15                  | NK      |                                                   |                                   |      |    |
| 59  | M   | Mod/Sev  | Accident  | NK                  | 2-3 m   | Mometasone, Simvastatin                           |                                   |      |    |

**Supplementary Table 1: Patient demographics. Cause:** NK = not known, RTA = road traffic accident, **Severity:** Mod/Sev = moderate to severe, Classification based on Malec et al., 2007, J Neurotrauma, **GCS:** Glasgow Coma Scale, **PTA(post-traumatic amnesia):** d = days, h = hours, m = minutes, **Contusion/Microbleed:** Structural findings in MR imaging, **Remarks:** MB = microbleed on gradient echo imaging, F = frontal, R = right, L = left, B = bilateral, Cont = contusions/gliotic change, O = occipital, TP = temporo-parietal, FP = fronto-parietal, SS = superficial siderosis
