# Supplementary material for: Disconnection of network hubs and cognitive impairment after traumatic brain injury
Source: PubMed Central journal article supplement — Brain. 2015 Mar 22;138(6):1696–709. doi: 10.1093/brain/awv075 (PMC4614120; doi:10.1093/brain/awv075), 2015-03-22
Supplement: 6b3921b9f6397efea0a64dc74d513131_brain-2014-01275-File020.pdf [file 6b3921b9f6397efea0a64dc74d513131_brain-2014-01275-File020.pdf]

|           | Microbleed patients & healthy controls |         | Microbleed patients without contusions & healthy controls |         |
|-----------|----------------------------------------|---------|-----------------------------------------------------------|---------|
| Threshold | Top SVM accuracy (%)                   | p-value | Top SVM accuracy (%)                                      | p-value |
| 0.0       | 86.3                                   | < 0.001 | 85.0                                                      | < 0.001 |
| 0.5       | 88.7                                   | < 0.001 | 88.5                                                      | < 0.001 |
| 1.0       | 89.3                                   | < 0.001 | 90.0                                                      | < 0.001 |
| 1.5       | 90.7                                   | < 0.001 | 89.0                                                      | < 0.001 |
| 2.0       | 91.0                                   | < 0.001 | 91.0                                                      | < 0.001 |
| 2.5       | 90.7                                   | < 0.001 | 93.0                                                      | < 0.001 |
| 3.0       | 92.3                                   | < 0.001 | 90.5                                                      | < 0.001 |
| 3.5       | 92.8                                   | < 0.001 | 92.5                                                      | < 0.001 |
| 4.0       | 93.4                                   | < 0.001 | 90.0                                                      | < 0.001 |
| 4.5       | 90.7                                   | < 0.001 | 88.5                                                      | < 0.001 |
| 5.0       | 90.7                                   | < 0.001 | 88.5                                                      | < 0.001 |

**Supplementary Table 5:** Support vector machine accuracies for a range of connectivity matrix thresholds, for microbleed patients and age-matched controls, as well as for the subset of microbleed patients without contusions and age-matched controls.
