# Supplementary material for: Disconnection of network hubs and cognitive impairment after traumatic brain injury
Source: PubMed Central journal article supplement — Brain. 2015 Mar 22;138(6):1696–709. doi: 10.1093/brain/awv075 (PMC4614120; doi:10.1093/brain/awv075), 2015-03-22
Supplement: 6cca03255babdd45de1ba070dec087ff_brain-2014-01275-File017.pdf [file 6cca03255babdd45de1ba070dec087ff_brain-2014-01275-File017.pdf]

| Graph metric               | Brief description                                                                                                 | Reference |
|----------------------------|-------------------------------------------------------------------------------------------------------------------|-----------|
| Assortativity coefficient  | A measure of correlation between the degrees of two connected nodes                                               | 1-3       |
| Betweenness centrality     | The ratio of shortest path lengths in a network that pass through a given node                                    | 4,5       |
| Characteristic path length | The average shortest path between all pairs of nodes in a network                                                 | 6-8       |
| Clustering coefficient     | The extent to which nodes tend to cluster together                                                                | 9,10      |
| Degree                     | The number of nodes connected to a given node                                                                     | 11-13     |
| Diameter                   | The maximum eccentricity in a network                                                                             | 14        |
| Diversity coefficient      | The uncertainty in assigning a given node to its local module                                                     | 15        |
| Eccentricity               | The maximum path length between a given node and any other node in a network                                      | 6-8       |
| Edge neighbourhood overlap | The extent to which their immediate neighbours overlap for a given pair of nodes                                  | 16        |
| Eigenvector centrality     | The extent to which the neighbours of a given node are connected to the rest of the network                       | 7,17,18   |
| Global efficiency          | The average of the inverse of all shortest path lengths in a network                                              | 8,19,20   |
| Local efficiency           | Same as global efficiency, but on the level of individual nodes                                                   | 21-23     |
| Matching index             | The extent to which pairs of nodes share connection patterns                                                      | 24,25     |
| Node coreness              | A given node has node coreness $k$ if it belongs to the $k^{\text{th}}$ core but not the $(k+1)^{\text{th}}$ core | 26        |
| Node pair degree           | The degree of each pair of nodes considered in the calculation of the edge neighbourhood overlap                  | 16        |
| Participation coefficient  | The ratio of a given node's connections within its local module to its connections with the rest of the network   | 25        |
| Radius                     | The minimum eccentricity between any two nodes in a network                                                       | 14        |
| Rich club coefficient      | The ratio of the number of edges connecting nodes of degree $k$ to their total possible connections               | 27-29     |
| Strength                   | A weighted version of degree                                                                                      | 8,30,31   |
| Transitivity               | A global version of clustering coefficient                                                                        | 31-33     |

### Supplementary Table 2: Summaries of graph metrics used in this study

#### References

- 1 Deuker L, Bullmore ET, Smith M, Christensen S, Nathan PJ, Rockstroh B, et al. Reproducibility of graph metrics of human brain functional networks. *Neuroimage*. 2009;47(4):1460-8.
- 2 Agosta F, Sala S, Valsasina P, Meani A, Canu E, Magnani G, et al. Brain network connectivity assessed using graph theory in frontotemporal dementia. *Neurology*. 2013.
- 3 Bialonski S, Lehnertz K. Assortative mixing in functional brain networks during epileptic seizures. *Chaos*. 2013;23(3):033139.
- 4 Fadlallah BH, Keil A, Principe JC. Functional dependence in the human brain: A graph theoretical analysis. *Engineering in Medicine and Biology Society (EMBC), 2013 35th Annual International Conference of the IEEE; 2013: IEEE; 2013*. p. 2948-51.
- 5 van Oort E, van Walsum A, Norris D. An investigation into the functional and structural connectivity of the Default Mode Network. *Neuroimage*. 2013.
- 6 Dennis EL, Jahanshad N, Rudie JD, Brown JA, Johnson K, McMahon KL, et al. Altered structural brain connectivity in healthy carriers of the autism risk gene, CNTNAP2. *Brain connectivity*. 2011;1(6):447-59.
- 7 Liang X, Connelly A, Calamante F. Graph analysis of resting-state ASL perfusion MRI data: Nonlinear correlations among CBF and network metrics. *Neuroimage*. 2013.
- 8 Xue K, Luo C, Zhang D, Yang T, Li J, Gong D, et al. Diffusion tensor tractography reveals disrupted structural connectivity in childhood absence epilepsy. *Epilepsy Res*. 2014;108(1):125-38.
- 9 Dubbelink KTO, Hillebrand A, Stoffers D, Deijen JB, Twisk JW, Stam CJ, et al. Disrupted brain network topology in Parkinson's disease: a longitudinal magnetoencephalography study. *Brain*. 2013:awt316.

- 10 Jiang G, Wen X, Qiu Y, Zhang R, Wang J, Li M, et al. Disrupted Topological Organization in Whole-Brain Functional Networks of Heroin-Dependent Individuals: A Resting-State fMRI Study. *PLoS One*. 2013;8(12):e82715.
- 11 Jan H, Chao Y-P, Cho K-H, Kuo L-W. Investigating the effects of streamline-based fiber tractography on matrix scaling in brain connective network. *Engineering in Medicine and Biology Society (EMBC), 2013 35th Annual International Conference of the IEEE; 2013: IEEE; 2013*. p. 523-6.
- 12 Göttlich M, Münte TF, Heldmann M, Kasten M, Hagenah J, Krämer UM. Altered Resting State Brain Networks in Parkinson's Disease. *PLoS One*. 2013;8(10):e77336.
- 13 Vives-Gilabert Y, Abdulkadir A, Kaller CP, Mader W, Wolf RC, Schelter B, et al. Detection of preclinical neural dysfunction from functional connectivity graphs derived from task fMRI. An example from degeneration. *Psychiatry Research: Neuroimaging*. 2013;214(3):322-30.
- 14 Rubinov M, Sporns O. Complex network measures of brain connectivity: uses and interpretations. *Neuroimage*. 2010;52(3):1059-69.
- 15 Cheng H, Wang Y, Sheng J, Kronenberger WG, Mathews VP, Hummer TA, et al. Characteristics and variability of structural networks derived from diffusion tensor imaging. *Neuroimage*. 2012;61(4):1153-64.
- 16 Easley D, Kleinberg J. *Networks, crowds, and markets*. Cambridge Univ Press. 2010;6(1):6.1.
- 17 Binnewijzend MA, Adriaanse SM, Flier WM, Teunissen CE, Munck JC, Stam CJ, et al. Brain network alterations in Alzheimer's disease measured by Eigenvector centrality in fMRI are related to cognition and CSF biomarkers. *Hum Brain Mapp*. 2013.
- 18 Geerligs L, Saliassi E, Renken RJ, Maurits NM, Lorist MM. Flexible connectivity in the aging brain revealed by task modulations. *Hum Brain Mapp*. 2013.
- 19 Chen Z, Liu M, Gross DW, Beaulieu C. Graph theoretical analysis of developmental patterns of the white matter network. *Front Hum Neurosci*. 2013;7.
- 20 Crone JS, Soddu A, Höller Y, Vanhauzenhuysse A, Schurz M, Bergmann J, et al. Altered network properties of the fronto-parietal network and the thalamus in impaired consciousness. *NeuroImage: Clinical*. 2014;4:240-8.
- 21 Klados MA, Kanatsouli K, Antoniou I, Babiloni F, Tsirka V, Bamidis PD, et al. A Graph Theoretical Approach to Study the Organization of the Cortical Networks during Different Mathematical Tasks. *PLoS One*. 2013;8(8):e71800.
- 22 Rzucidlo JK, Roseman PL, Laurienti PJ, Dagenbach D. Stability of whole brain and regional network topology within and between resting and cognitive states. *PLoS One*. 2013;8(8):e70275.
- 23 Sami S, Miall RC. Graph network analysis of immediate motor-learning induced changes in resting state BOLD. *Front Hum Neurosci*. 2013;7.
- 24 Sporns O, Chialvo DR, Kaiser M, Hilgetag CC. Organization, development and function of complex brain networks. *Trends Cogn Sci*. 2004;8(9):418-25.
- 25 Sporns O, Honey CJ, Kotter R. Identification and classification of hubs in brain networks. *PLoS One*. 2007;2(10):e1049.
- 26 Hagmann P, Cammoun L, Gigandet X, Meuli R, Honey CJ, Wedeen VJ, et al. Mapping the structural core of human cerebral cortex. *PLoS Biol*. 2008;6(7):e159.
- 27 van den Heuvel MP, Sporns O. Rich-club organization of the human connectome. *J Neurosci*. 2011;31(44):15775-86.
- 28 Grayson DS, Ray S, Carpenter S, Iyer S, Dias TGC, Stevens C, et al. Structural and Functional Rich Club Organization of the Brain in Children and Adults. *PLoS One*. 2014;9(2):e88297.
- 29 Mišić B, Sporns O, McIntosh AR. Communication Efficiency and Congestion of Signal Traffic in Large-Scale Brain Networks. *PLoS Comput Biol*. 2014;10(1):e1003427.
- 30 Hwang K, Hallquist MN, Luna B. The development of hub architecture in the human functional brain network. *Cereb Cortex*. 2012.

- 31 Goñi J, van den Heuvel MP, Avena-Koenigsberger A, de Mendizabal NV, Betzel RF, Griffa A, et al. Resting-brain functional connectivity predicted by analytic measures of network communication. PNAS. 2013;201315529.
- 32 Anderson A, Cohen MS. Decreased small-world functional network connectivity and clustering across resting state networks in schizophrenia: an fMRI classification tutorial. Front Hum Neurosci. 2013;7.
- 33 Ingalhalikar M, Smith A, Parker D, Satterthwaite TD, Elliott MA, Ruparel K, et al. Sex differences in the structural connectome of the human brain. PNAS. 2013.
