# Supplementary material for: Disconnection of network hubs and cognitive impairment after traumatic brain injury
Source: PubMed Central journal article supplement — Brain. 2015 Mar 22;138(6):1696–709. doi: 10.1093/brain/awv075 (PMC4614120; doi:10.1093/brain/awv075), 2015-03-22
Supplement: 36ee1acece0af6871d782d094a19ecef_brain-2014-01275-File019.pdf [file 36ee1acece0af6871d782d094a19ecef_brain-2014-01275-File019.pdf]

| <b>N</b> | <b>Top SVM accuracy (%)</b> | <b>p-value</b> |
|----------|-----------------------------|----------------|
| 1        | 93.1                        | < 0.001        |
| 2        | 93.2                        | < 0.001        |
| 3        | 93.2                        | < 0.001        |
| 4        | 92.9                        | < 0.001        |
| 5        | 92.9                        | < 0.001        |
| 6        | 92.1                        | < 0.001        |
| 7        | 93.4                        | < 0.001        |
| 8        | 92.2                        | < 0.001        |
| 9        | 92.2                        | < 0.001        |
| 10       | 92.6                        | < 0.001        |

**Supplementary Table 4:** Accuracies of support vector machines trained at various training/validation split sizes of repeated random sub-sampling validation, where N is the number of subjects removed from each subject group (patients and controls).
