# Supplementary material for: Disconnection of network hubs and cognitive impairment after traumatic brain injury
Source: PubMed Central journal article supplement — Brain. 2015 Mar 22;138(6):1696–709. doi: 10.1093/brain/awv075 (PMC4614120; doi:10.1093/brain/awv075), 2015-03-22
Supplement: b87b05df6b91ed14bd221ed85bb3666b_brain-2014-01275-File015.pdf [file b87b05df6b91ed14bd221ed85bb3666b_brain-2014-01275-File015.pdf]

**Supplementary Figure 1:** Scatter plots of eigenvector centrality (binary) vs. reaction time for controls and patients with microbleeds.

**Supplementary Figure 2:** Scatter plots of eigenvector centrality (binary) vs. executive function for controls and patients with microbleeds.

**Supplementary Figure 3:** Scatter plots of betweenness centrality (binary) vs. associative memory for controls and patients with microbleeds.

**Supplementary Figure 4:** Scatter plots of eigenvector centrality (binary) vs. reaction time for controls and patients without microbleeds.

**Supplementary Figure 5:** Scatter plots of eigenvector centrality (binary) vs. executive function for controls and patients without microbleeds.

**Supplementary Figure 6:** Scatter plots of betweenness centrality (binary) vs. associative memory for controls and patients without microbleeds.
