# Supplementary material for: Disconnection of network hubs and cognitive impairment after traumatic brain injury
Source: PubMed Central journal article supplement — Brain. 2015 Mar 22;138(6):1696–709. doi: 10.1093/brain/awv075 (PMC4614120; doi:10.1093/brain/awv075), 2015-03-22

Right superior frontal gyrus

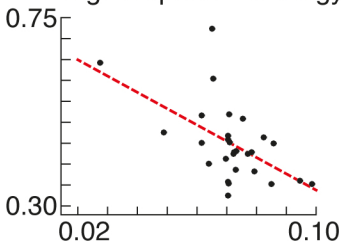

Right cingulate cortex (posterior)

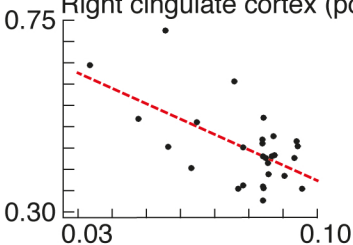

Right cingulate cortex (anterior)

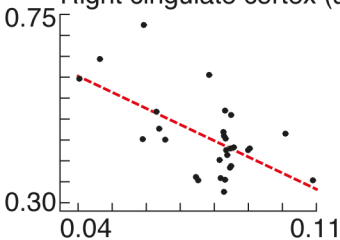

Left peri-callosal region

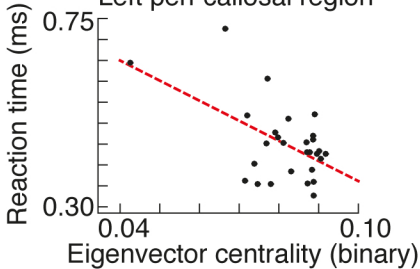

Supplement: c6bdb81a93391bb46a7843262e51cc52_brain-2014-01275-File009.pdf [file c6bdb81a93391bb46a7843262e51cc52_brain-2014-01275-File009.pdf]
