# Supplementary material for: Disconnection of network hubs and cognitive impairment after traumatic brain injury
Source: PubMed Central journal article supplement — Brain. 2015 Mar 22;138(6):1696–709. doi: 10.1093/brain/awv075 (PMC4614120; doi:10.1093/brain/awv075), 2015-03-22
Supplement: fa7869103fdcf8812c02c2b34bba00c7_brain-2014-01275-File018.pdf [file fa7869103fdcf8812c02c2b34bba00c7_brain-2014-01275-File018.pdf]

| Max T-score | X   | Y   | Z   | JHU Tractography Label                                                                            |
|-------------|-----|-----|-----|---------------------------------------------------------------------------------------------------|
| 8.67        | 0   | -6  | 14  | -                                                                                                 |
| 8.61        | 20  | -12 | 1   | R. Corticospinal tract                                                                            |
| 8.39        | -23 | -52 | 15  | Forceps major                                                                                     |
| 8.32        | -25 | 39  | -2  | L. Inferior fronto-occipital fasciculus / L. Uncinate fasciculus / L. Anterior thalamic radiation |
| 8.05        | -17 | 36  | 18  | Forceps minor / Cingulum Bundle                                                                   |
| 7.90        | -19 | -11 | -10 | -                                                                                                 |
| 7.88        | 5   | -24 | 24  | -                                                                                                 |
| 7.88        | -32 | -24 | 1   | L. Inferior fronto-occipital fasciculus, L. Inferior longitudinal fasciculus                      |
| 7.85        | 4   | 1   | -4  | -                                                                                                 |
| 7.84        | -17 | -15 | -10 | L. Corticospinal tract                                                                            |

**Supplementary Table 3:** Peaks of fractional anisotropy abnormality in traumatic brain injury patients. Fractional anisotropy reduction in the TBI group is widespread across the brain compared to controls. The table reports the peaks of highly significant differences between patients and controls. Labels are taken from the John Hopkins University atlases, as incorporated within FSL. Right (R) and Left (L).
