# Supplementary figures and images for: Disconnection of network hubs and cognitive impairment after traumatic brain injury
Source: PubMed Central journal article supplement — Brain. 2015 Mar 22;138(6):1696–709. doi: 10.1093/brain/awv075 (PMC4614120; doi:10.1093/brain/awv075), 2015-03-22

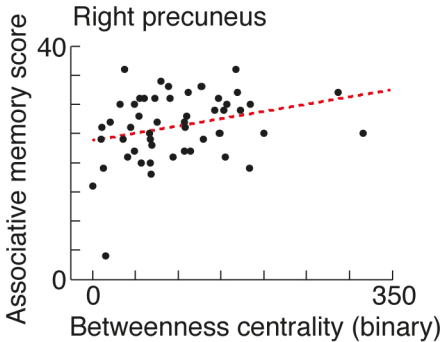

Supplement: 343debe2ef70d714917c459d4fe0d877_brain-2014-01275-File014.pdf [file 343debe2ef70d714917c459d4fe0d877_brain-2014-01275-File014.pdf]

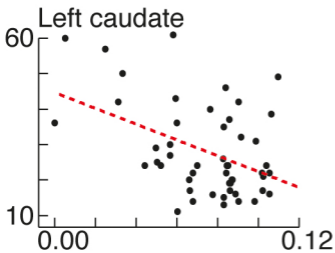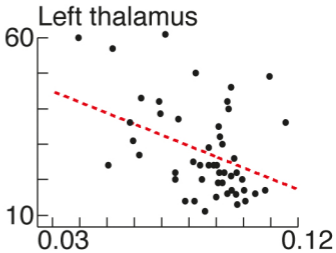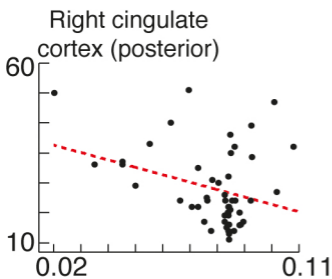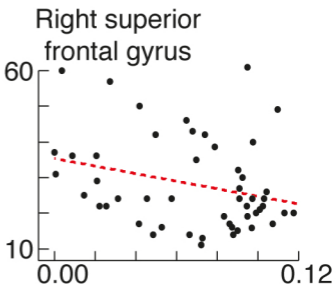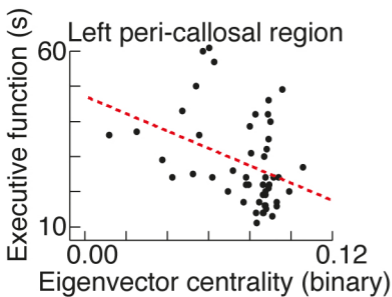

Supplement: 4193d3b8434d0581f9f1644e93bc0969_brain-2014-01275-File013.pdf [file 4193d3b8434d0581f9f1644e93bc0969_brain-2014-01275-File013.pdf]

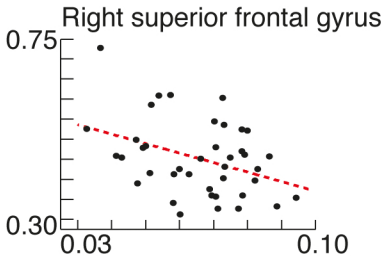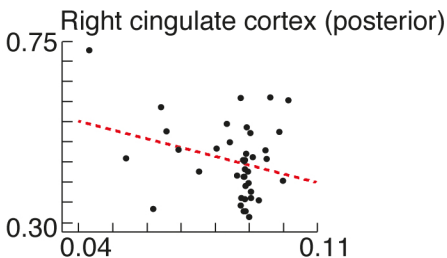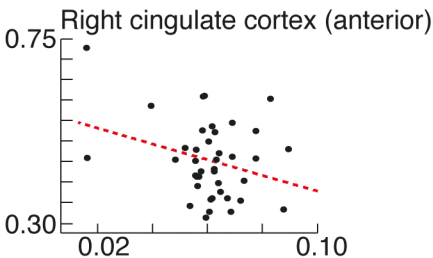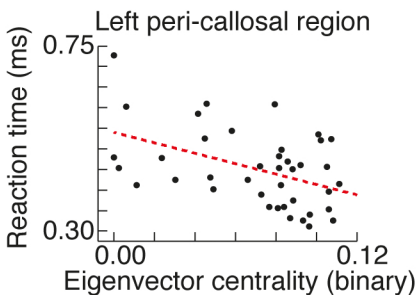

Supplement: a66de2516d507644ff52e9cea19fd31c_brain-2014-01275-File012.pdf [file a66de2516d507644ff52e9cea19fd31c_brain-2014-01275-File012.pdf]

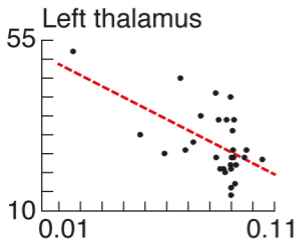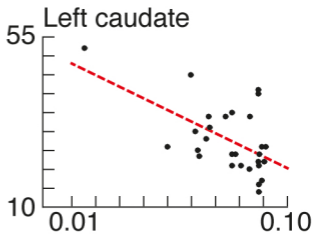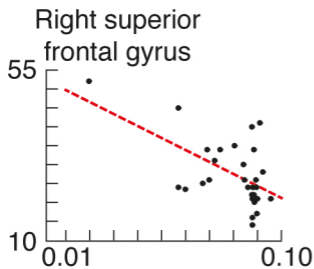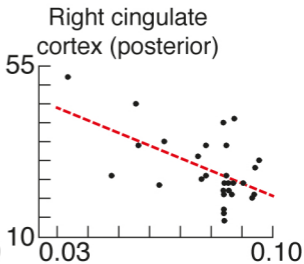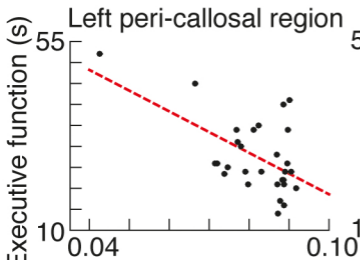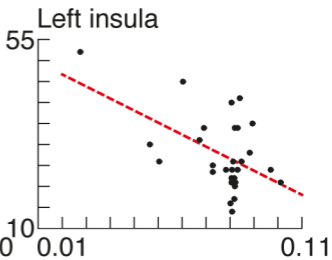

Eigenvector centrality (binary)

Supplement: b76f6249a7d587024358cce82a20a2d7_brain-2014-01275-File010.pdf [file b76f6249a7d587024358cce82a20a2d7_brain-2014-01275-File010.pdf]

Left caudate

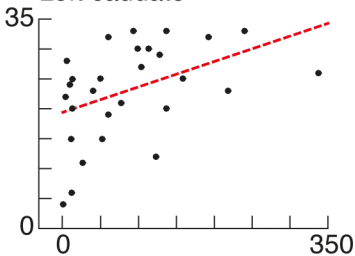

Left orbitofrontal cortex

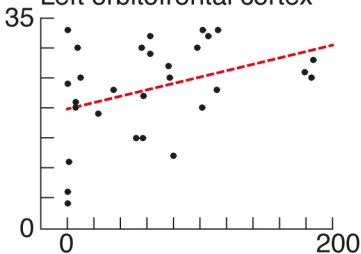

Left superior frontal gyrus

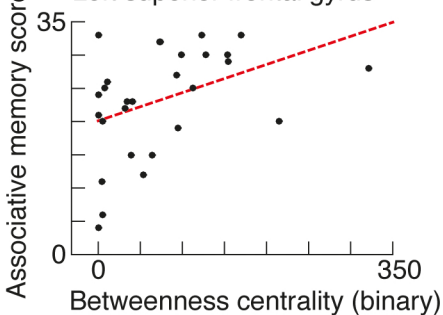

Supplement: c7df88349b741e5826d63f0080dc3324_brain-2014-01275-File011.pdf [file c7df88349b741e5826d63f0080dc3324_brain-2014-01275-File011.pdf]
